1 **Probing the polarity of GABAergic transmission in vivo**

2

3 Olivier Dubanet<sup>1</sup>, Arnaldo Ferreira<sup>1</sup>, Andreas Frick<sup>1</sup>, Hajime Hirase<sup>2</sup>, Anna Beyeler<sup>1</sup>, Xavier Leinekugel<sup>1\*</sup>

4

5 1. University of Bordeaux, INSERM U1215, Neurocentre Magendie, 33077 Bordeaux, France

6 2. Center for Translational Neuromedicine, University of Copenhagen

7 \*corresponding author : xavier@arcadi.eu

8

9

10

11

12 **Abstract**

13 In vitro studies have reported high intracellular chloride levels, depolarizing and potentially excitatory  
14 actions of GABA in various pathological conditions. Consequently, great expectations are now pinned  
15 on drugs potentially restoring low  $[Cl^-]_i$  as novel therapies for a wide range of brain disorders. However,  
16 the clinical relevance of this hypothesis remains largely speculative because of the yet unresolved  
17 technical difficulty to evaluate the polarity of GABAergic transmission in vivo. Here, we show that the  
18 polarity of GABAergic transmission can be probed across the CA3 hippocampal circuit in vivo with  
19 single cell resolution, by combining extracellular detection of unitary inhibitory postsynaptic field-  
20 potentials (fIPSPs) and silicon probe recording of the firing activity of multiple individually identified  
21 neurons. As an example application, we provide direct evidence for depolarizing actions of perisomatic  
22 GABAergic transmission and time-locked excitation of CA3 pyramidal neurons in acute and chronic  
23 mouse models of epilepsy.

24

25

## 26 Introduction

27 GABAergic inhibition relies on ionotropic GABA-A and metabotropic GABA-B receptors. The fast  
28 and time-locked inhibition considered essential for neuronal coding is the one mediated by GABA-A  
29 receptors (GABA-A R), permeable to chloride ions ( $\text{Cl}^-$ ). In normal conditions, neurons maintain a low  
30 intracellular concentration of chloride ( $[\text{Cl}^-]_i$ ), so that the reversal potential of  $\text{Cl}^-$  mediated currents is  
31 more negative than the resting potential<sup>1</sup>. GABA release therefore generates an influx of  $\text{Cl}^-$ , with an  
32 hyperpolarizing effect on membrane potential, and inhibition of neuronal discharge.

33 Recent publications have proposed the implication of defective inhibition in the etiology of  
34 various pathologies including epilepsy, depression, schizophrenia, Down Syndrome or Autism  
35 Spectrum Disorders<sup>2-9</sup>. In vitro experiments have suggested that defective function of the K-Cl co-  
36 transporter KCC2, that would normally extrude  $\text{Cl}^-$  from the cell, was responsible for a reversed polarity  
37 of GABAergic synaptic transmission from inhibitory to excitatory, participating in epileptogenesis in  
38 animal models<sup>10-17</sup> as well as in human tissue resected from epileptic patients<sup>18-20</sup>. But one major  
39 difficulty in the study of GABAergic inhibition is to avoid artefactual interference with the native  $\text{Cl}^-$   
40 gradient, a main determinant of GABA-A R mediated inhibitory function. Perforated-patch clamp  
41 recordings with the compound antibiotic gramicidin provide electrical access to the cell through the  
42 formation of pores in the membrane, permeable to cations but impermeant to  $\text{Cl}^-$ . Perforated-patch  
43 recordings with gramicidin have been successfully used in vitro to record GABAergic synaptic currents,  
44 while keeping intracellular  $\text{Cl}^-$  unaffected by the pipette solution<sup>10, 11, 16, 21</sup>. But previous work has also  
45 demonstrated that  $\text{Cl}^-$  gradient can be affected by the slicing procedure<sup>22, 23</sup>, questioning the claims  
46 for excitatory GABAergic transmission based on in vitro recordings<sup>23</sup>.

47 In vivo treatment with the diuretic bumetanide, which also reduces the accumulation of  $\text{Cl}^-$  ions  
48 in neurons through the inhibition of the  $\text{Cl}^-$  intruder NKCC1, was found to reduce behavioural  
49 abnormalities in rat and mouse models of Autism Spectrum Disorders<sup>5</sup> and seizures in animal models  
50 of epilepsy<sup>24-28</sup>. But bumetanide has a limited bio-availability in the brain due to poor blood brain  
51 barrier penetration<sup>29-31</sup>, and it is finally unclear if its action in vivo was indeed due to the restoration of  
52 neuronal  $\text{Cl}^-$  gradient and inhibitory GABAergic transmission.

53 Direct investigation of the polarity of GABAergic transmission in vivo puts serious constraints in  
54 terms of experimental access, and the evaluation of synaptic responses to GABA-A R activation is  
55 challenging. Adapting to in vivo conditions the extracellular recording of unitary GABAergic  
56 postsynaptic potentials (field IPSPs) previously described in vitro<sup>32-34</sup>, we could evaluate the polarity of  
57 perisomatic GABAergic signaling in the intact brain. As an exemple application, we now report the first  
58 direct evidence for depolarizing actions of perisomatic GABAergic transmission and time-locked  
59 excitation of CA3 pyramidal neurons in acute and chronic mouse models of epilepsy. We believe that  
60 this demonstration will pave the way for the investigation of  $\text{Cl}^-$  homeostasis and inhibitory function in

61 vivo, in physiological conditions and in situations in which alteration or even reversal of GABAergic  
62 transmission is hypothesized to occur. It also constitutes an invaluable tool to quantify the actual in  
63 vivo efficacy of drugs designed to modulate Cl<sup>-</sup> homeostasis and restore physiological GABAergic  
64 inhibition, thereby meeting high clinical and therapeutical expectations.

65

## 66 **Results**

67

### 68 **Extracellular recording of perisomatic field-IPSPs and time-locked inhibition of CA3 pyramidal cell** 69 **firing in vivo.**

70 Non-invasive recording of the dynamics of GABAergic synaptic transmission in vivo is a challenge.  
71 Previous work in vitro has suggested that perisomatic inhibitory postsynaptic signals originating from  
72 individual interneurons (basket and chandelier cells) could be recorded as extracellular field potentials  
73 (fIPSPs) from their target pyramidal-cell population<sup>32-34</sup>. This approach offers several main advantages.  
74 First, extracellular recordings preserve native [Cl<sup>-</sup>]<sub>i</sub>. Second, the polarity of the field events indicates  
75 the direction of the current elicited in the target population of pyramidal cells, thereby addressing the  
76 question of depolarizing vs hyperpolarizing polarity of GABAergic postsynaptic signaling. And third,  
77 combined with units recording and spike sorting of neuronal discharges, extracellular detection of  
78 population fIPSPs provides a time reference to investigate the net effect of GABAergic perisomatic  
79 synaptic signals on the firing of the target neurons with single cell resolution, allowing a direct  
80 quantification of the efficacy of inhibition or excitation provided by perisomatic GABAergic inputs.

81 In order to evaluate the efficiency and polarity of perisomatic GABAergic transmission in the  
82 hippocampus in vivo, we have therefore inserted silicon probes into the dorsal CA3 pyramidal layer of  
83 urethane-anesthetized mice, recording spontaneous local field potentials and unitary neuronal  
84 activity. As illustrated in Fig. 1, spontaneous activity from the CA3 pyramidal layer included action  
85 potentials (units) and positive local field events with a profile similar to that of fIPSPs previously  
86 described in vitro as the GABA-A receptor mediated postsynaptic potentials originating from PV  
87 interneurons<sup>34</sup>. Accordingly, these events were characterized by a fast rise time ( $2.01 \pm 0.53$ ms, n=8  
88 mice) and a decay time constant increased by the GABA-A modulator diazepam (2mg/kg, IP) from  
89  $3.65 \pm 0.05$ ms to  $4.19 \pm 0.06$ ms (n=3 mice, p<0.01, two-tailed paired t-test, t = 9.13, DF = 2). As observed  
90 in vitro and expected from perisomatically projecting interneurons (basket and chandelier cells), in  
91 vivo fIPSPs provided very powerful time-locked inhibition of local pyramidal cells. Accordingly, multi-  
92 unit pyramidal cell activity was almost fully interrupted by fIPSPs, as observed in the traces shown in  
93 Fig. 1b and in the trough that follows fIPSPs in the peri-event time histogram (PETH) shown in Fig. 1d-  
94 e. Beside the peak firing that precedes fIPSPs and probably reflects the recruitment of perisomatic  
95 inhibition by pyramidal cells discharge<sup>34</sup>,  $79.05 \pm 14.93\%$  of the 139 putative pyramidal cells obtained

96 from 8 mice were significantly inhibited by fIPSPs, resulting in a population firing reduced by  
97 92.3±4.5%, returning to baseline values after 9.75±2.8ms (n=8 mice).

98

99 **Perisomatic fIPSPs specifically originate from PV interneurons and provide homeostatic**  
100 **redistribution of individual pyramidal cells firing rates in the CA3 hippocampal network.**

101 In order to verify that fIPSPs actually originate from PV interneurons, we recorded the  
102 extracellular field-potential responses to the optogenetic activation of PV interneurons. PV-Cre mice  
103 were injected with the DIO hChR2 (E123T/T159C)-EYFP construct in the CA3 region in order to express  
104 the cationic actuator ChR2 specifically in PV interneurons. PV immuno-staining of the infected mice  
105 showed excellent specificity, with 96 to 100% (98.3±2%, n=3 mice) of the infected (GFP-positive) cells  
106 being also PV-positive (Supplementary Fig. 1a). As illustrated in Fig. 2, brief (2ms) local optogenetic  
107 activation of PV interneurons did evoke reliable fIPSPs, together with powerful time-locked inhibition  
108 of local pyramidal cells (n=33 pyramidal cells from 5 mice). PV interneuron firing is therefore sufficient  
109 to evoke fIPSPs. In order to know whether other types of interneurons also significantly contributed to  
110 the generation of perisomatic fIPSPs during spontaneous CA3 activity, PV-Cre mice were injected with  
111 the FLEX-rev::PSAML141F,Y115F:GlyR-IRES-GFP construct to express the inhibitory pharmacogenetic  
112 actuator PSAM-GlyR specifically in PV interneurons. PV immuno-staining of the infected mice showed  
113 that in addition to high specificity (99±1%, n=3 mice), 98±1% (n=3 mice) of the PV-positive cells in the  
114 region of recording were also GFP-positive (Supplementary Fig. 1b), indicating that most PV  
115 interneurons expressed PSAM-GlyR. As illustrated in Fig. 3g-h, the pharmacogenetic inhibition of PV  
116 interneurons induced by local injection of the exogenous ligand PSEM-89S very efficiently suppressed  
117 spontaneous fIPSPs, from 6.58±3.50 to 0.45±0.66 events/s (n= 5 mice, p<0.05, two-sided Wilcoxon  
118 Mann-Whitney Test), suggesting that the recorded fIPSPs originated predominantly from PV  
119 interneurons.

120 Even though pharmacogenetic silencing of PV interneurons in the anesthetized mouse did not  
121 increase the global firing rate of the CA3 pyramidal cell population (Fig. 3h, 1.19±2.72Hz in control vs  
122 0.96±1.04Hz in PSEM-89S, n=5 mice, NS, two-sided Wilcoxon Mann-Whitney Test), it did affect  
123 individual cells firing. As illustrated in Supplementary Fig. 2, the correlation coefficient between  
124 individual cells firing rates in consecutive epochs of 10min indicated a remarkable stability, both in  
125 baseline (r=0.987, p<0.001) and after PV interneuron silencing (r=0.79, p<0.001). On the other hand,  
126 as illustrated in Fig. 3i, the firing rates before vs after PSEM-89S were hardly correlated (r=0.38,  
127 p<0.05), indicating that PV interneuron silencing induced a redistribution of firing rates among  
128 pyramidal neurons within the CA3 circuit.

129

130 **Depolarizing and excitatory perisomatic GABAergic transmission in acute seizures in the drug-free**  
131 **mouse.**

132 The reversal potential of Cl<sup>-</sup>-mediated GABAergic currents (E-GABA) is controlled by the passive  
133 movement and active transport of Cl<sup>-</sup> through various ionic channels and transporters in the plasma  
134 membrane. During spontaneous activity, Cl<sup>-</sup> ions flowing through GABA-A channels tend to shift the  
135 reversal potential of GABAergic currents toward membrane potential. E-GABA is therefore a very  
136 dynamic process that depends on ongoing fluctuations of membrane potential and GABAergic  
137 conductances. During seizures, GABA is massively released by interneurons while pyramidal cells are  
138 depolarized, therefore getting loaded with Cl<sup>-</sup> until extrusion mechanisms restore an hyperpolarizing  
139 Cl<sup>-</sup> gradient. It is therefore expected that due to the time course of Cl<sup>-</sup> extrusion, high Cl<sup>-</sup> load and  
140 excitatory GABA might participate in a deficit of inhibition immediately after a seizure<sup>16, 35</sup>. However,  
141 the time dynamics of Cl<sup>-</sup> balance through intrusion and extrusion systems that has been studied in vitro  
142 largely remains to be characterized in vivo. As illustrated in Fig. 4, taking advantage of fIPSPs as a non  
143 invasive index of the polarity of GABAergic currents in the CA3 pyramidal population, we have  
144 investigated the dynamics of perisomatic inhibition during acute interictal and ictal seizures in  
145 unanesthetized mice. In order to monitor both spontaneous and evoked fIPSPs, PV-Cre mice were  
146 infected with the DIO-hChR2-EYFP construct in the CA3 region. Light stimulation with a locally  
147 positioned optical fiber provided evoked fIPSPs by direct stimulation of PV interneurons. Acute seizures  
148 were induced by a brief and focal intra-hippocampal injection of the convulsive agent bicuculline in  
149 the contralateral hemisphere. Electrophysiological recordings displayed both interictal activity and  
150 hippocampal ictal seizures, recognized as complex events lasting 30 to 40 seconds ( $39.25 \pm 2.5s$ , n=6  
151 seizures from 4 mice), even though the animal did not show behavioural convulsions. While in  
152 comparison to baseline, fIPSPs were not significantly affected between epileptic discharges, they  
153 transiently appeared with a reversed polarity after the termination of ictal seizures, returning to  
154 normal polarity within 182 to 434 seconds after the termination of the seizure event ( $219.76 \pm 128.56s$ ,  
155 n=6 seizures from 4 mice), suggesting transiently reversed polarity of GABAergic transmission after  
156 ictal seizures, but not after acute interictal discharges. Moreover, reversed fIPSPs entrained the  
157 discharge of postsynaptic neurons, as indicated by the peak in the peri-event histograms between  
158 reversed fIPSPs and multi-unit activity, suggesting not only depolarizing but also excitatory action of  
159 perisomatic GABAergic synaptic transmission. No more fIPSP-related excitatory interactions were seen  
160 after the recovery of the polarity of fIPSPs. These results suggest that an ictal seizure can entrain  
161 transient depolarizing and excitatory actions of perisomatic GABAergic transmission in the CA3 circuit.

162

163 **Discrete excitatory perisomatic GABAergic transmission in a chronic model of epilepsy.**

164 Acute ictal seizures, as induced experimentally by the injection of the convulsive agent kainic acid  
165 (KA), can turn into chronic epilepsy after a silent period of up to several weeks. Previous work on  
166 another model of epilepsy has suggested that reversed (excitatory) GABAergic transmission might be  
167 involved in the transition between acute seizures and chronic epilepsy<sup>11, 14, 27</sup>. This condition is of high  
168 clinical relevance because incident occurrence of isolated seizures in human is known to be a main  
169 factor for the development of chronic epilepsy after a latent period that can last from months to  
170 several years<sup>36</sup>. Identifying the cellular mechanisms responsible for this transition would therefore  
171 potentially offer opportunities for preventive treatment against epilepsy.

172 We have evaluated the dynamics of perisomatic inhibition in the CA3 hippocampal region of  
173 anesthetized KA-treated mice during the latent period, one week after KA injection in the contralateral  
174 hippocampus<sup>37</sup>. Interictal discharges were present in all KA-treated mice, but in none of the control  
175 animals (Supplementary Fig. 3). Among all identified fIPSPs, none appeared of reversed polarity,  
176 whether in control or in KA-treated mice, suggesting that GABAergic transmission remained globally  
177 hyperpolarizing at the network level. Nevertheless, because the polarity of fIPSPs represents the  
178 average response of all the local pyramidal targets of the discharging presynaptic interneuron(s), the  
179 possibility remained that a subpopulation of pyramidal cells might be depolarized or even excited by  
180 GABAergic transmission in spite of a globally hyperpolarizing fIPSP population response. We therefore  
181 evaluated the response of individual neurons to spontaneous fIPSPs, and indeed identified a minority  
182 of neurons (n=4 out of 78 putative pyramidal cells from 3 KA-treated mice, among a total of 195  
183 putative pyramidal cells from 8 KA-treated mice) that fired action potentials in response to GABAergic  
184 synaptic inputs. Individual examples of putative pyramidal cells displaying the three distinct types of  
185 observed responses to spontaneous fIPSPs (time locked excitation, time-locked inhibition, or no clear  
186 change in net firing rate) are illustrated in Fig. 5. Therefore, analyzing single cell responses to fIPSPs  
187 revealed an heterogeneity of GABAergic alterations among KA-injected animals. These observations  
188 suggest that fIPSPs *in vivo* may be useful to investigate whether the extent of reversed GABAergic  
189 transmission at various delays after an acute seizure episode is involved in the distinct etiological  
190 outcome among individual animals, differentially affected by the initial insult.

191

192

## 193 Discussion

194

195 The possibility that altered Cl<sup>-</sup> homeostasis and functionally reversed GABAergic transmission  
196 (from inhibitory to excitatory) might be involved in major pathologies such as epilepsy, autism  
197 spectrum disorders or schizophrenia, has recently raised considerable interest<sup>2-5, 10-15, 18, 19, 25, 26, 38, 39</sup>.  
198 However, a direct assessment of this hypothesis has been hindered by the technical difficulty of

199 probing  $\text{Cl}^-$  gradient and GABAergic synaptic function in vivo. Neuronal  $[\text{Cl}^-]_i$  is very labile and even  
200 intracellular recordings with sharp electrodes, which limit cytoplasmic wash-out, do not preserve  
201 membrane integrity, potentially altering resting potential and endogenous  $\text{Cl}^-$  gradient. Indirect  
202 evaluation of pyramidal cell response to optogenetic activation of GABAergic interneurons from the  
203 frequency of glutamatergic inputs<sup>23</sup>, or direct cell-attached recording of single-channel currents,  
204 including those evoked by GABA uncaging within the recording pipette<sup>40</sup>, are elegant approaches but  
205 do not resolve the dynamics of synaptic transmission. On the other hand, previous work in vitro  
206 suggested that the postsynaptic response of hippocampal pyramidal cells to their perisomatic  
207 GABAergic inputs could be recorded extracellularly, as field-Inhibitory Postsynaptic Potentials (fIPSPs),  
208 and that the polarity of fIPSPs could be used as an index of  $\text{Cl}^-$  gradient and polarity of GABAergic  
209 transmission. Indeed, perisomatically projecting interneurons (basket and chandelier cells) have a  
210 densely arborised axon specifically confined to the pyramidal cell layer, and contact a large proportion  
211 of pyramidal cells within a restricted projection area<sup>41, 42</sup>, so that each action potential of the  
212 interneuron triggers the nearly synchronous release of GABA on hundreds of target pyramidal cells,  
213 which postsynaptic responses (IPSPs) sum up and can be readily identified from a local extracellular  
214 electrode<sup>32-34</sup>, with a polarity reflecting that of the  $\text{Cl}^-$  gradient<sup>32, 33</sup>. This approach is well suited to  
215 preserving endogenous  $[\text{Cl}^-]_i$ , can be performed in vivo, and opens the possibility to resolve the  
216 dynamics of  $\text{Cl}^-$  gradient and polarity of GABAergic transmission over the course of ongoing synaptic  
217 activity. A strong limitation however is that fIPSPs are the average response of multiple pyramidal cells  
218 and therefore lack the resolution of individual cells, so that changes in GABAergic polarity could be  
219 detected if they affect the whole neuronal population but may be missed if affecting only a subset of  
220 cells. Moreover, GABAergic transmission involves both voltage and conductance changes, so that  
221 reversed  $[\text{Cl}^-]_i$  and depolarizing GABA carry a complex combination of excitatory (through  
222 depolarization) and inhibitory (through increased conductance) influences<sup>21, 43-46</sup>. As a consequence,  
223 determining the net postsynaptic effect of GABAergic transmission requires a direct readout of  
224 postsynaptic firing activity. For all these reasons, we now propose that the method of choice to probe  
225  $\text{Cl}^-$  gradient and GABAergic synaptic function in vivo lies in combined multi-electrode recording and  
226 spike-sorting methods. While fIPSPs provide the timing and global (average) polarity of perisomatic  
227 GABAergic synaptic events, the distributions (peri-event time histograms) of the spikes of individually  
228 identified neurons provide the net functional effect of GABAergic transmission, with single cell  
229 resolution.

230 In line with previous in vitro evidence for the direct involvement of basket and chandelier cells in  
231 the generation of fIPSPs<sup>32-34</sup>, we provide direct evidence that in vivo fIPSPs originate mostly from PV  
232 interneurons, because they were elicited by the optogenetic activation of PV interneuronal firing, and  
233 largely eliminated by the pharmacogenetic inhibition of PV interneuronal firing. Perisomatic inhibition



234 is considered to be functionally optimal for the control of neuronal discharge, with synapses  
235 strategically located on the soma and close to the site of action potential initiation<sup>47, 48</sup>. PV basket and  
236 chandelier cells are thus considered to play a major role in the control of pyramidal cells firing through  
237 time-locked inhibition, presumably preventing excessive firing within the hippocampal circuit.  
238 However, in spite of the critical importance of excitatory-inhibitory interactions in the recurrent CA3  
239 circuit, the literature is strikingly missing direct reports of the dynamics of excitatory-inhibitory  
240 interactions in this neuronal circuit, presumably because of the technical difficulties to identify  
241 perisomatic inhibitory events in vivo. Our experimental results confirm that perisomatic GABAergic  
242 transmission provides very powerful time-locked inhibition of most CA3 pyramidal neurons. An  
243 interesting observation is that the blockade of PV interneuron firing was responsible for a  
244 redistribution of pyramidal cell activity, but was not accompanied by any major quantitative change of  
245 activity at the network level. This suggests that perisomatic inhibition may be involved in the control  
246 of the timing of pyramidal cells discharge rather than quantitative control of the network discharge.  
247 Previous reports are compatible with this hypothesis. In a previous study conducted in vitro, we have  
248 reported that fIPSPs were rather poorly recruited by network activity, suggesting that perisomatic  
249 inhibition should be more efficient in shaping the timing of spike flow than in limiting excitatory  
250 runaway recruitment and preventing the generation of hyper-synchronized discharges. Previous  
251 report that transgenic mice with specifically disrupted glutamatergic inputs to parvalbumin-positive  
252 interneurons displayed hippocampo-dependent spatial memory impairment but no epileptic  
253 phenotype are also in support of this interpretation<sup>49, 50</sup>.

254 But one major advantage offered by the extracellular recording of fIPSPs is the possibility to  
255 evaluate the efficiency, and even the polarity, of perisomatic GABAergic transmission in a variety of  
256 conditions, including pathological conditions in which GABAergic transmission is suspected to be  
257 affected, or even reversed, due to altered neuronal Cl<sup>-</sup> homeostasis. Cl<sup>-</sup> gradient is dependent on both  
258 recent neuronal activity involving Cl<sup>-</sup> currents and the dynamics of pumps and transporters involved in  
259 maintaining physiological Cl<sup>-</sup> gradient. Our experiments have tested the possibility to detect the  
260 consequences for Cl<sup>-</sup> regulation and GABAergic transmission of both acute hyperactivity and chronic  
261 epilepsy. We report that transient hypersynchronized discharges induce a global reversal of neuronal  
262 Cl<sup>-</sup> and polarity of GABAergic transmission, shifting from inhibitory to excitatory for a duration of  
263 several tens of seconds before returning to normal polarity and efficiency. While this reversal of  
264 GABAergic polarity is readily seen as a reversed polarity of fIPSPs, we also report a more subtle effect  
265 during the course of epileptogenesis in the KA model of chronic epilepsy. One week after KA injection,  
266 we observed that perisomatic GABAergic transmission provided time-locked excitation to a minority  
267 of pyramidal neurons in the hippocampus, while we did not observe a reversed polarity of fIPSPs. This  
268 suggests that subtle alterations in the regulation of Cl<sup>-</sup> homeostasis and GABAergic transmission



269 already operate in the hippocampal circuit during the latent period that precedes the establishment  
270 of chronic epilepsy. The functional consequences of defective GABAergic transmission in a minority of  
271 neurons, both in terms of coding and circuit dynamics, remain to be investigated. Independently of  
272 seizure generation, reversed GABAergic transmission might significantly affect neuronal processing  
273 and information coding.

274 The extracellular detection of perisomatic IPSPs therefore provides an invaluable tool to evaluate  
275 Cl<sup>-</sup> homeostasis and inhibitory function, in physiological conditions and in situations in which alteration  
276 or even reversal of GABAergic transmission is hypothesized to occur. This approach opens new  
277 possibilities to evaluate the relevance of the excitatory GABA hypothesis in physiological development,  
278 autism spectrum disorders, schizophrenia, various forms of epilepsy and the time course of  
279 epileptogenesis, as well as to evaluate the potential of pharmacological interference with neuronal Cl<sup>-</sup>  
280 gradient as an effective therapeutic strategy against major brain diseases.

281

282

283 **Acknowledgements.** We thank Roustem Khazipov, Rosa Cossart, Valérie Crepel, Tarek Deeb and Isabel  
284 Del Pino for useful comments and discussions on a previous version of the manuscript, Delphine  
285 Gonzales, Nathalie Aubailly, and all the personnel of the Animal Facility of the NeuroCentre Magendie  
286 for animal care, Katy Lecorff for her help regarding virus preparation, the UMR5293 vector core facility  
287 for producing AAV vectors, and the laboratory of S.M. Sternson (Howard Hughes Medical Institute) for  
288 providing the chemical compound PSEM-89S.

289 **Funding.** This work was performed thanks to the following funding sources: INSERM, CNRS (XL), Région  
290 Nouvelle Aquitaine (XL, AB), the Japanese Society for the Promotion of Science (JSPS, XL, HH), the Brain  
291 and Behavior Research Foundation (AB), Agence Nationale pour la Recherche (ANR, XL), the Fondation  
292 Française pour la Recherche sur les Epilepsies (FFRE, XL), the French Ministry of Research and  
293 Education (OD). The funders had no role in study design, data collection and analysis, decision to  
294 publish, or preparation of the manuscript.

295 **Competing interests.** The authors have declared that no competing interests exist.

296 **Author contributions.** XL and HH performed pilot experiments and initiated the study. XL conceived  
297 and designed the experiments. OD and XL planned the study. OD, A. Ferreira, AB and XL performed the  
298 experiments. OD and XL analyzed the data. A. Frick contributed with lab and breeding space, and a  
299 fraction of running expenses. OD, AB and XL wrote the paper.

300 **Data availability.** The data shown in the paper will be made available upon reasonable request to the  
301 corresponding author.

302 **Code availability.** The custom code used for analysis will be made available upon reasonable request  
303 to the corresponding author.

304 **References**

305

- 306 1. Blaesse, P., Airaksinen, M.S., Rivera, C. & Kaila, K. Cation-Chloride Cotransporters and  
307 Neuronal Function. *Neuron* **61**, 820-838 (2009).
- 308 2. Ben-Ari, Y. NKCC1 Chloride Importer Antagonists Attenuate Many Neurological and  
309 Psychiatric Disorders. *Trends in Neurosciences* **40**, 536-554 (2017).
- 310 3. Doyon, N., Vinay, L., Prescott, Steven A. & De Koninck, Y. Chloride Regulation: A Dynamic  
311 Equilibrium Crucial for Synaptic Inhibition. *Neuron* **89**, 1157-1172 (2016).
- 312 4. Deidda, G., *et al.* Reversing excitatory GABAAR signaling restores synaptic plasticity and  
313 memory in a mouse model of Down syndrome. *Nature Medicine* **21**, 318-326 (2015).
- 314 5. Tyzio, R., *et al.* Oxytocin-mediated GABA inhibition during delivery attenuates autism  
315 pathogenesis in rodent offspring. *Science* **343**, 675-679 (2014).
- 316 6. Lopez-Pigozzi, D., *et al.* Altered Oscillatory Dynamics of CA1 Parvalbumin Basket Cells  
317 during Theta-Gamma Rhythmopathies of Temporal Lobe Epilepsy. *eNeuro* **3**, ENEURO.0284-  
318 0216.2016 (2016).
- 319 7. Valero, M., *et al.* Mechanisms for Selective Single-Cell Reactivation during Offline Sharp-  
320 Wave Ripples and Their Distortion by Fast Ripples. *Neuron* **94**, 1234-1247.e1237 (2017).
- 321 8. Menendez de la Prida, L. & Trevelyan, A.J. Cellular mechanisms of high frequency oscillations  
322 in epilepsy: On the diverse sources of pathological activities. *Epilepsy Research* **97**, 308-317 (2011).
- 323 9. Cellot, G. & Cherubini, E. GABAergic Signaling as Therapeutic Target for Autism Spectrum  
324 Disorders. *Frontiers in Pediatrics* **2** (2014).
- 325 10. Barmashenko, G., Hefft, S., Aertsen, A., Kirschstein, T. & Köhling, R. Positive shifts of the  
326 GABAA receptor reversal potential due to altered chloride homeostasis is widespread after status  
327 epilepticus. *Epilepsia* **52**, 1570-1578 (2011).
- 328 11. Pathak, H.R., *et al.* Disrupted Dentate Granule Cell Chloride Regulation Enhances Synaptic  
329 Excitability during Development of Temporal Lobe Epilepsy. *The Journal of Neuroscience* **27**, 14012-  
330 14022 (2007).
- 331 12. Nardou, R., *et al.* Neuronal chloride accumulation and excitatory GABA underlie aggravation  
332 of neonatal epileptiform activities by phenobarbital. *Brain* **134**, 987-1002 (2011).
- 333 13. Moore, Y.E., Kelley, M.R., Brandon, N.J., Deeb, T.Z. & Moss, S.J. Seizing Control of KCC2:  
334 A New Therapeutic Target for Epilepsy. *Trends in Neurosciences* **40**, 555-571 (2017).
- 335 14. Bragin, D.E., Sanderson, J.L., Peterson, S., Connor, J.A. & Müller, W.S. Development of  
336 epileptiform excitability in the deep entorhinal cortex after status epilepticus. *European Journal of*  
337 *Neuroscience* **30**, 611-624 (2009).
- 338 15. Chen, L., *et al.* KCC2 downregulation facilitates epileptic seizures. *Scientific Reports* **7**, 156  
339 (2017).

- 340 16. Ellender, T.J., Raimondo, J.V., Irkle, A., Lamsa, K.P. & Akerman, C.J. Excitatory Effects of  
341 Parvalbumin-Expressing Interneurons Maintain Hippocampal Epileptiform Activity via Synchronous  
342 Afterdischarges. *The Journal of Neuroscience* **34**, 15208-15222 (2014).
- 343 17. Di Cristo, G., Awad, P.N., Hamidi, S. & Avoli, M. KCC2, epileptiform synchronization, and  
344 epileptic disorders. *Progress in Neurobiology* **162**, 1-16 (2018).
- 345 18. Cohen, I., Navarro, V., Clemenceau, S., Baulac, M. & Miles, R. On the Origin of Interictal  
346 Activity in Human Temporal Lobe Epilepsy in Vitro. *Science* **298**, 1418-1421 (2002).
- 347 19. Huberfeld, G., *et al.* Perturbed Chloride Homeostasis and GABAergic Signaling in Human  
348 Temporal Lobe Epilepsy. *The Journal of Neuroscience* **27**, 9866-9873 (2007).
- 349 20. Pallud, J., *et al.* Cortical GABAergic excitation contributes to epileptic activities around human  
350 glioma. *Science Translational Medicine* **6**, 244ra289-244ra289 (2014).
- 351 21. Gullledge, A.T. & Stuart, G.J. Excitatory actions of GABA in the cortex. *Neuron* **37**, 299-309  
352 (2003).
- 353 22. van der Pol, A.N., Obrietan, K. & Chen, G. Excitatory Actions of GABA after Neuronal Trauma.  
354 *The Journal of Neuroscience* **16**, 4283-4292 (1996).
- 355 23. Valeeva, G., Tressard, T., Mukhtarov, M., Baude, A. & Khazipov, R. An Optogenetic Approach  
356 for Investigation of Excitatory and Inhibitory Network GABA Actions in Mice Expressing  
357 Channelrhodopsin-2 in GABAergic Neurons. *The Journal of Neuroscience* **36**, 5961-5973 (2016).
- 358 24. Dzhalala, V.I., *et al.* NKCC1 transporter facilitates seizures in the developing brain. *Nature*  
359 *Medicine* **11**, 1205 (2005).
- 360 25. Kahle, K.T. & Staley, K.J. The bumetanide-sensitive Na-K-2Cl cotransporter NKCC1 as a  
361 potential target of a novel mechanism-based treatment strategy for neonatal seizures. *Neurosurgical*  
362 *Focus* **25**, E22 (2008).
- 363 26. Marguet, S.L., *et al.* Treatment during a vulnerable developmental period rescues a genetic  
364 epilepsy. *Nature Medicine* **21**, 1436-1444 (2015).
- 365 27. Kourdougli, N., *et al.* Depolarizing  $\gamma$ -aminobutyric acid contributes to glutamatergic network  
366 rewiring in epilepsy. *Annals of Neurology* **81**, 251-265 (2017).
- 367 28. Brandt, C., Nozadze, M., Heuchert, N., Rattka, M. & Löscher, W. Disease-Modifying Effects  
368 of Phenobarbital and the NKCC1 Inhibitor Bumetanide in the Pilocarpine Model of Temporal Lobe  
369 Epilepsy. *The Journal of Neuroscience* **30**, 8602-8612 (2010).
- 370 29. Römermann, K., *et al.* Multiple blood-brain barrier transport mechanisms limit bumetanide  
371 accumulation, and therapeutic potential, in the mammalian brain. *Neuropharmacology* **117**, 182-194  
372 (2017).
- 373 30. Donovan, M.D., Schellekens, H., Boylan, G.B., Cryan, J.F. & Griffin, B.T. In vitro bidirectional  
374 permeability studies identify pharmacokinetic limitations of NKCC1 inhibitor bumetanide. *European*  
375 *Journal of Pharmacology* **770**, 117-125 (2016).

- 376 31. Puskarjov, M., Kahle, K.T., Ruusuvuori, E. & Kaila, K. Pharmacotherapeutic targeting of  
377 cation-chloride cotransporters in neonatal seizures. *Epilepsia* **55**, 806-818 (2014).
- 378 32. Glickfeld, L.L., Roberts, J.D., Somogyi, P. & Scanziani, M. Interneurons hyperpolarize  
379 pyramidal cells along their entire somatodendritic axis. *Nature Neuroscience* **12**, 21-23 (2009).
- 380 33. Bazelot, M., Dinocourt, C., Cohen, I. & Miles, R. Unitary inhibitory field potentials in the CA3  
381 region of rat hippocampus. *J Physiol* **588**, 2077-2090 (2010).
- 382 34. Beyeler, A., *et al.* Recruitment of Perisomatic Inhibition during Spontaneous Hippocampal  
383 Activity. *PLoS.One.* **8**, e66509 (2013).
- 384 35. Fujiwara-Tsukamoto, Y., Isomura, Y., Nambu, A. & Takada, M. Excitatory GABA input  
385 directly drives seizure-like rhythmic synchronization in mature hippocampal CA1 pyramidal cells.  
386 *Neuroscience* **119**, 265-275 (2003).
- 387 36. French, J.A., *et al.* Characteristics of medial temporal lobe epilepsy: I. Results of history and  
388 physical examination. *Annals of Neurology* **34**, 774-780 (1993).
- 389 37. Riban, V., *et al.* Evolution of hippocampal epileptic activity during the development of  
390 hippocampal sclerosis in a mouse model of temporal lobe epilepsy. *Neuroscience* **112**, 101-111 (2002).
- 391 38. Löscher, W., Puskarjov, M. & Kaila, K. Cation-chloride cotransporters NKCC1 and KCC2 as  
392 potential targets for novel antiepileptic and antiepileptogenic treatments. *Neuropharmacology* **69**, 62-  
393 74 (2013).
- 394 39. MacKenzie, G., O'Toole, K.K., Moss, S.J. & Maguire, J. Compromised GABAergic inhibition  
395 contributes to tumor-associated epilepsy. *Epilepsy Research* **126**, 185-196 (2016).
- 396 40. Minlebaev, M., Valeeva, G., Tcheremiskine, V., Coustillier, G. & Khazipov, R. Cell-attached  
397 recordings of responses evoked by photorelease of GABA in the immature cortical neurons. *Frontiers*  
398 *in Cellular Neuroscience* **7** (2013).
- 399 41. Sik, A., Penttonen, M., Ylinen, A. & Buzsaki, G. Hippocampal CA1 interneurons: an in vivo  
400 intracellular labeling study. *The Journal of Neuroscience* **15**, 6651-6665 (1995).
- 401 42. Buhl, E.H., *et al.* Physiological properties of anatomically identified axo-axonic cells in the rat  
402 hippocampus. *Journal of Neurophysiology* **71**, 1289-1307 (1994).
- 403 43. Kirmse, K., *et al.* GABA depolarizes immature neurons and inhibits network activity in the  
404 neonatal neocortex in vivo. *Nature Communications* **6**, 7750 (2015).
- 405 44. Khalilov, I., Minlebaev, M., Mukhtarov, M. & Khazipov, R. Dynamic Changes from  
406 Depolarizing to Hyperpolarizing GABAergic Actions during Giant Depolarizing Potentials in the  
407 Neonatal Rat Hippocampus. *The Journal of Neuroscience* **35**, 12635-12642 (2015).
- 408 45. Staley, K.J. & Mody, I. Shunting of excitatory input to dentate gyrus granule cells by a  
409 depolarizing GABAA receptor-mediated postsynaptic conductance. *Journal of Neurophysiology* **68**,  
410 197-212 (1992).
- 411 46. Tyzio, R., *et al.* Postnatal changes in somatic gamma-aminobutyric acid signalling in the rat  
412 hippocampus. *European Journal of Neuroscience* **27**, 2515-2528 (2008).

- 413 47. Somogyi, P. & Klausberger, T. Defined types of cortical interneurone structure space and spike  
414 timing in the hippocampus. *J Physiol* **562**, 9-26 (2005).
- 415 48. Miles, R., Toth, K., Gulyas, A.I., Hajos, N. & Freund, T.F. Differences between somatic and  
416 dendritic inhibition in the hippocampus. *Neuron* **16**, 815-823 (1996).
- 417 49. Racz, A., Ponomarenko, A.A., Fuchs, E.C. & Monyer, H. Augmented hippocampal ripple  
418 oscillations in mice with reduced fast excitation onto parvalbumin-positive cells. *The Journal of*  
419 *Neuroscience* **29**, 2563-2568 (2009).
- 420 50. Fuchs, E.C., *et al.* Recruitment of parvalbumin-positive interneurons determines hippocampal  
421 function and associated behavior. *Neuron* **53**, 591-604 (2007).
- 422



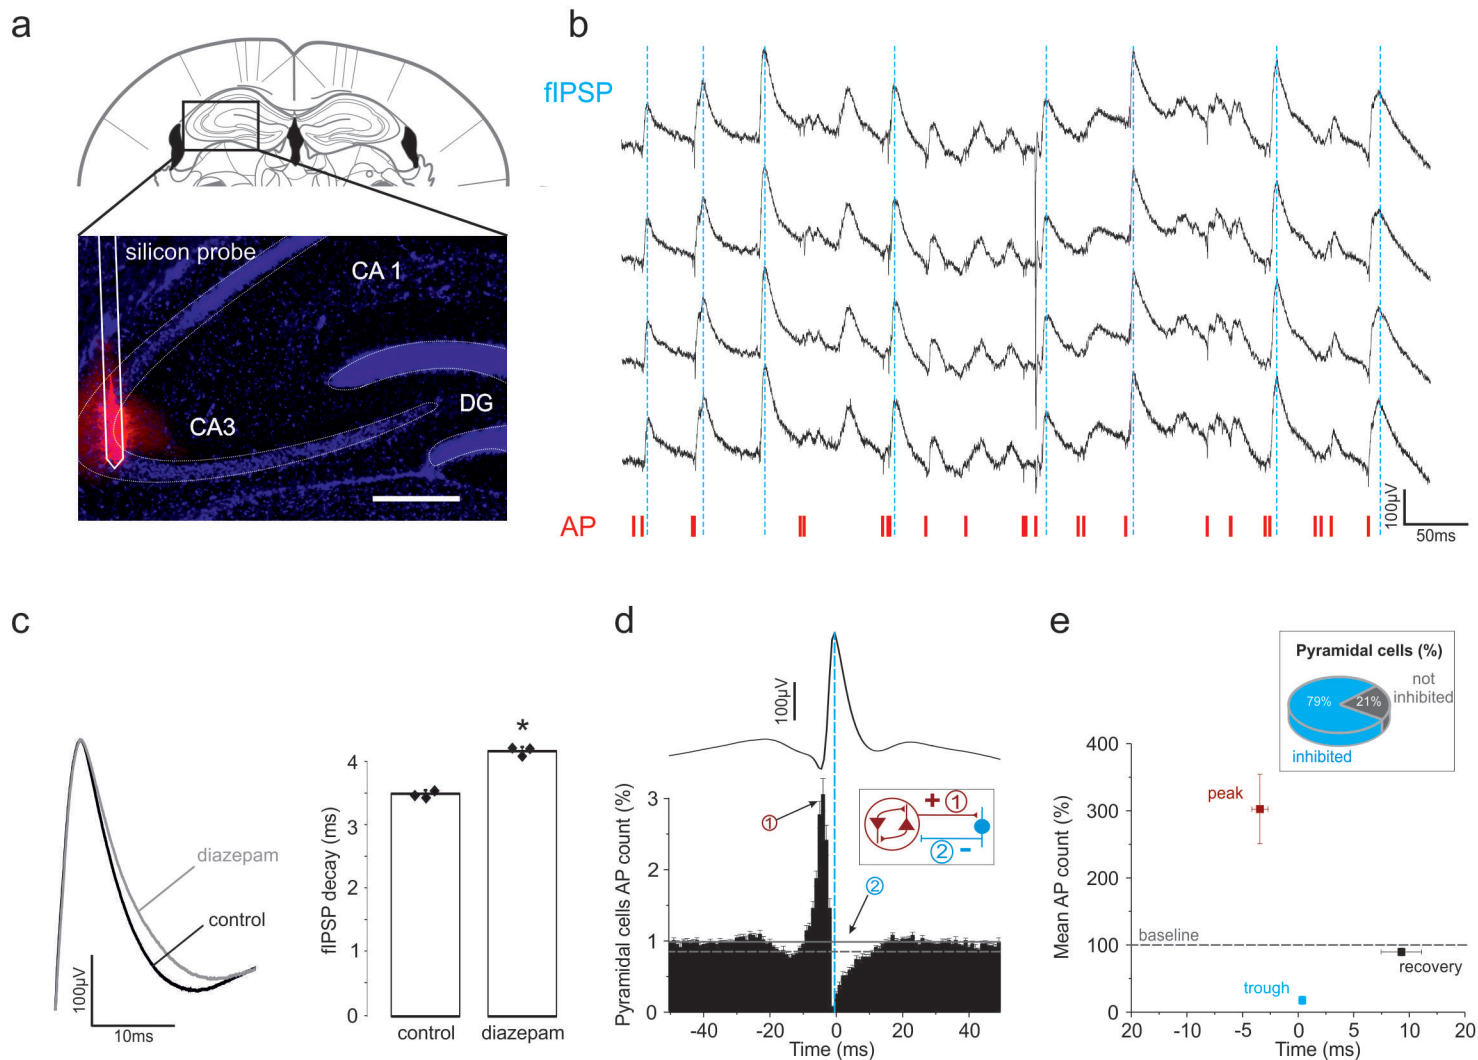

### Figure 1: Spontaneous extracellular field inhibitory post-synaptic potentials (fIPSPs) in vivo

**(a)** Schematic of electrode track and histological verification of recording location within the CA3 hippocampal region (**DiI-labeled silicon probe in red, DAPI staining in blue**).

**(b)** Exemplar trace of spontaneous wide-band (0.1Hz-9KHz) field-recording activity in the CA3 pyramidal layer, displaying 4 channels (10-20 $\mu$ m distance between recording sites) of the same shank of a 2-shanks Neuronexus Buzsaki 16 silicon probe. Field-events of positive polarity (upward deflections), fIPSPs (peaks, **dashed blue lines**). Fast downward deflections, action potentials (AP), also labeled below as raster display (**red ticks, multi-unit activity**). Note the transient interruption of neuronal firing after fIPSPs.

**(c)** Comparison of fIPSP decay (left, superimposed average traces normalized on amplitude, right, fIPSPs decay times, mean $\pm$  SD, \*\*  $p < 0.01$ ) in control (**black**) and in presence of diazepam (**grey**). Note prolonged fIPSP decay under diazepam.

**(d)** Peri-event time histogram (mean and SD,  $n=8$  WT mice, time bin 1 ms) between all the spikes discharged by putative pyramidal cells and fIPSPs (reference, peak-time), shown as average trace on top at the same time scale and aligned on peak (**dotted blue line**). Baseline mean and 2SD are respectively shown as **plain and dotted horizontal grey lines**. Note increased pyramidal cell discharge in the 10 ms prior to fIPSP, and the strong inhibition (trough, max inhibition) that follows. **Inset**, schematic illustration of the recurrent excitatory/inhibitory loop: (1) the collective discharge of interconnected pyramidal cells activates the discharge of local interneurons, resulting (2) in perisomatic fIPSP and inhibition of pyramidal population activity.

**(e)** Diagram illustrating firing rates (mean  $\pm$  SD, same 8 mice as in D; baseline level = 100%, calculated from -50 ms to -30 ms) at **peak** (bin of maximum firing in the 10ms prior to fIPSPs), **trough** (bin of minimum firing in the 4ms post-fIPSPs), and **recovery** (last of post-fIPSPs time bin below baseline - 2SD) time points. **Inset**, proportion of pyramidal cells ( $n=139$  from 8 mice) with a significant post-fIPSPs trough (ie inhibited vs not-inhibited neurons).

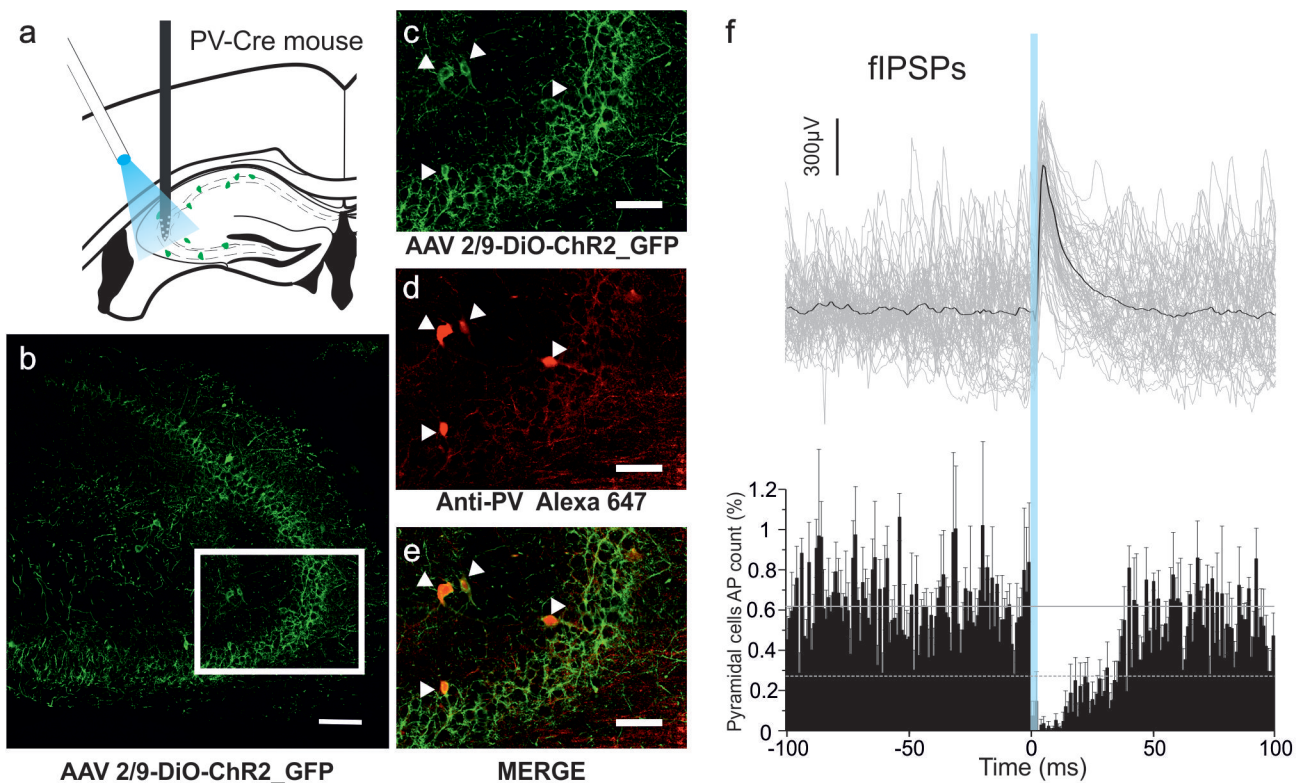

## Figure 2: In vivo fIPSPs generated by optogenetic activation of PV interneurons

**(a)** Schematic representation of electrode and optic fiber positions in PV-Cre mice with AAV-driven ChR2 and GFP expression in CA3 PV interneurons.

**(b-e)** Confocal stacks of GFP-positive (**green**) and PV-positive (**red**) immunostaining in the hippocampal CA3 region. **(b, scale bar, 100 $\mu$ m)** GFP immuno staining. **(c-e, scale bar, 50 $\mu$ m)**, higher magnification of the CA3a region delimited by the **white rectangle** in B). **(C)** GFP immuno-staining. **(d)** PV immunostaining. **(e)** Overlay. Note the co-localization on the 4 identified PV interneurons (arrow-heads).

**(f)** Peri-event time histogram (mean  $\pm$  SD,  $n=5$  mice, time bin 1 ms) between all the spikes discharged by putative pyramidal cells and optogenetically evoked (laser ON 2ms, **blue bar**) fIPSPs (reference), shown as superimposed (**grey**) and average (**black**) traces ( $n=60$  from a single representative recording) on top, aligned and at the same time scale. Note the powerful time-locked inhibition of pyramidal cell firing in response to fIPSPs evoked by the optogenetic stimulation of PV interneurons.



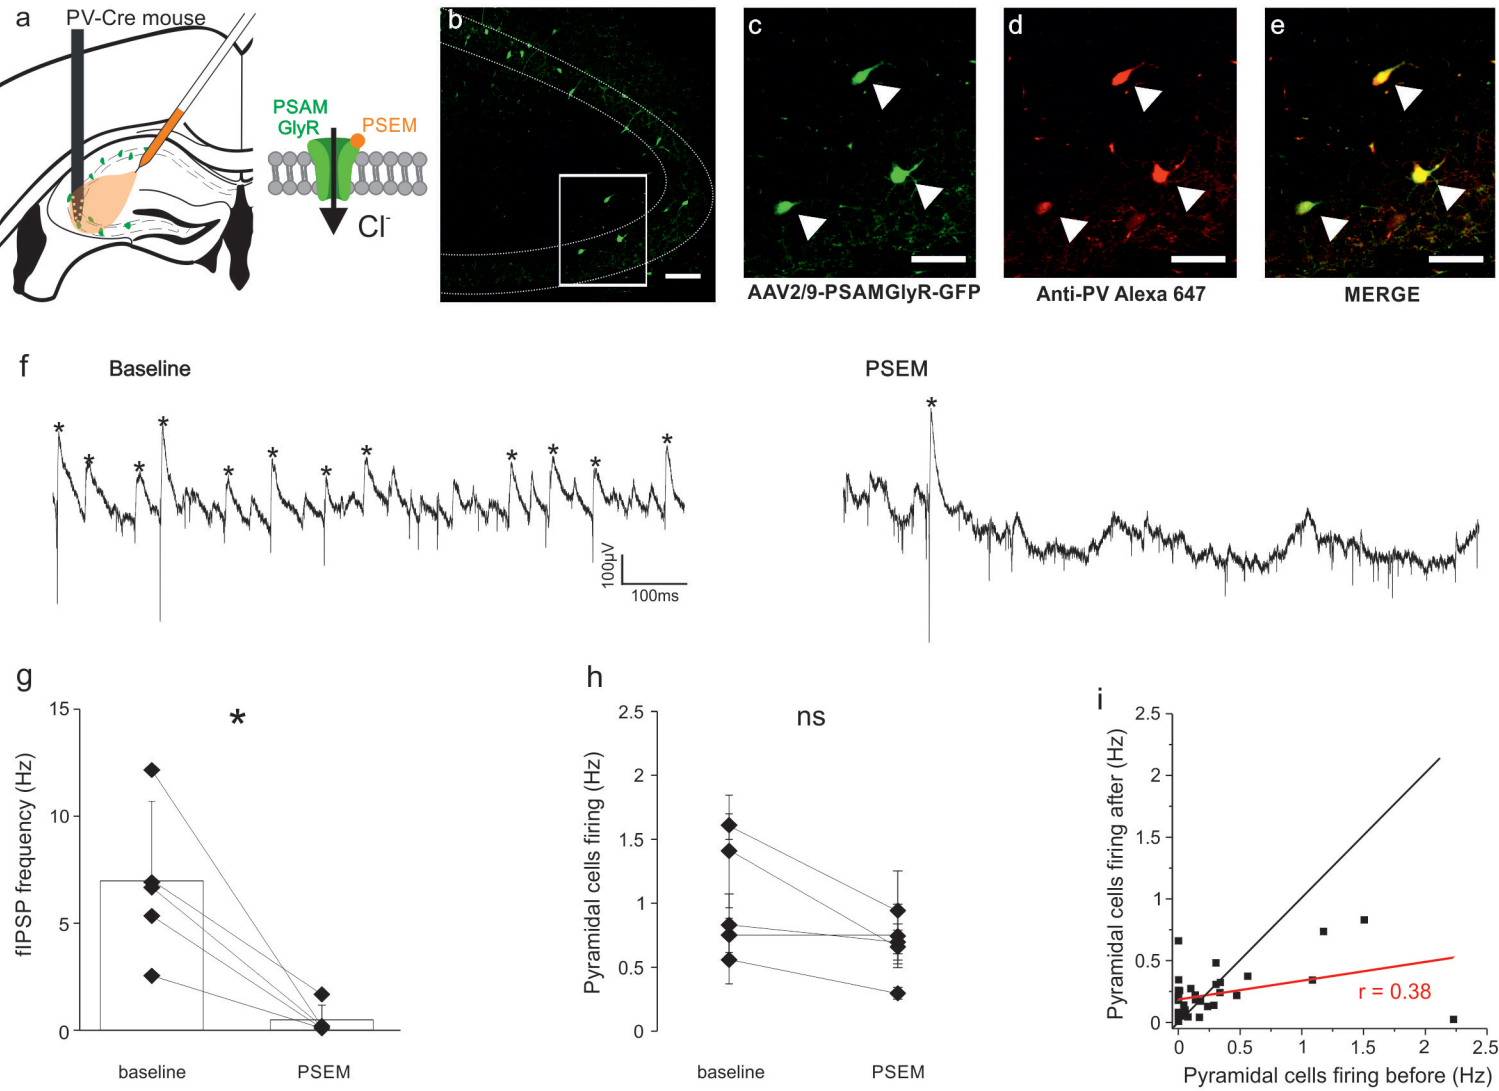

**Figure 3: Inhibition of fIPSPs by pharmacogenetic inactivation of PV interneurons**

(a) Schematic representation of electrode and injection site in PV-Cre mice with AAV-driven PSAM-GlyR and GFP expression in CA3 PV interneurons.

(b-e) Confocal stacks of GFP-positive (green) and PV-positive (red) immunostaining in the hippocampal CA3 region. (b, scale bar, 100µm) GFP immuno staining. (c-e, scale bar, 50µm), higher magnification of the CA3a region delimited by the white rectangle in B). (c) GFP immuno-staining. (d) PV immunostaining. (e) Overlay. Note the co-localization of PV and PSAM-GlyR immuno-staining on the 3 labeled interneurons (arrow-heads).

(f) Example traces of spontaneous wide-band (0.1Hz-9KHz) field-recording activity in the CA3 pyramidal layer, in control (left, baseline) and in presence of the exogenous ligand PSEM-89S (right, PSEM). Note the drastic reduction in fIPSPs expression (\*).

(g-h) Summary plots (mean ± SD, n=5 mice) of fIPSP frequency (g) and pyramidal population firing rate (h) in control (baseline) and in presence of PSEM (\* p<0.05).

(i) Individual pyramidal cells firing rates (n=36 putative pyramidal cells from 3 mice) in control ("before" is the 10min period that immediately precedes PSEM-89S injection) and in presence of PSEM ("after" period is from 5 to 15min after PSEM-89S injection). Black line, bisector (y=x). Red line, linear regression line. Note that the pharmacogenetic blockade of PV interneurons with PSAM-GlyR redistributed individual firing rates without any significant change on global population firing activity.

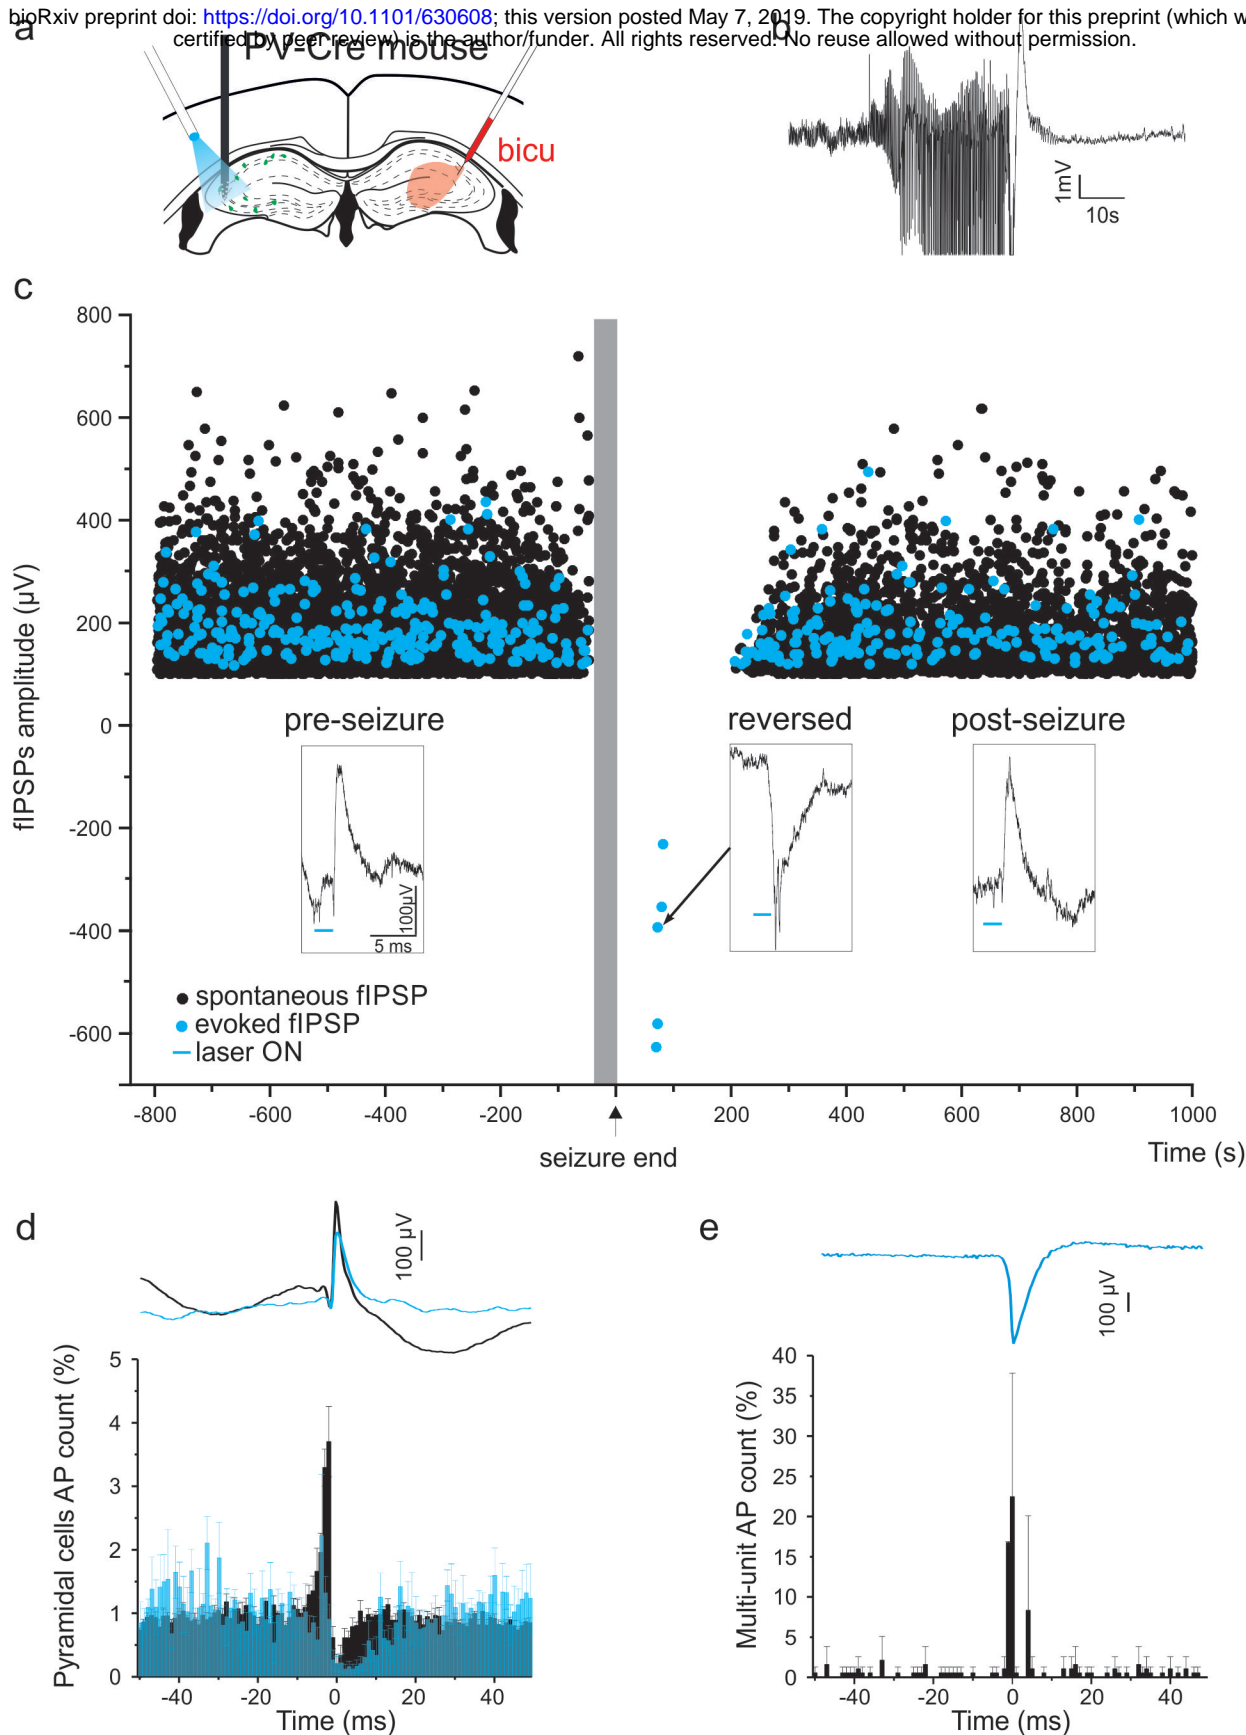



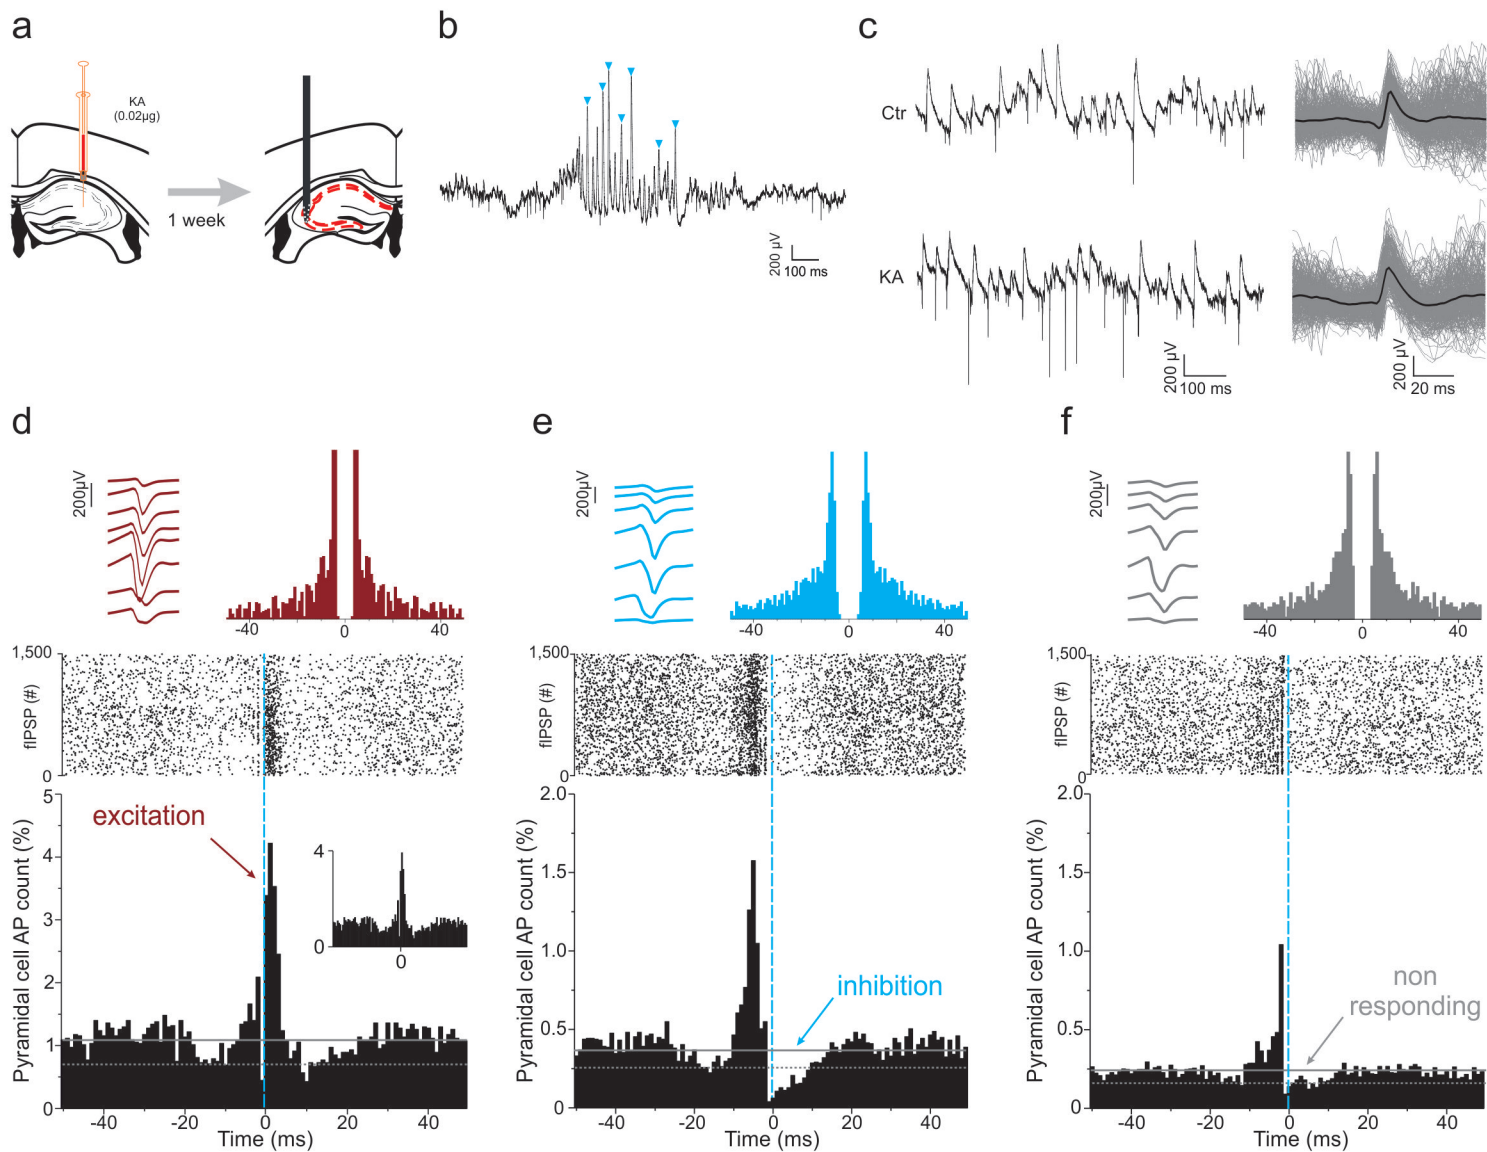

**Figure 5: Normal fIPSP polarity but GABA-mediated time-locked excitation in head-fixed KA-treated mice**

**(a)** CA3 neuronal activity was recorded from urethane-anesthetized WT mice one week after contralateral, intra-hippocampal KA injection.

**(b)** Exemple trace (wide-band LFP) of interictal burst (interictal spikes, **blue arrow-heads**).

**(c)** Exemple traces of spontaneous CA3 pyramidal layer activity (left) and superimposed and averaged traces of fIPSPs (right), in control (top) and KA (below) conditions. Note the presence of normal polarity, frequent fIPSPs, in both conditions.

**(d-f)** Individual examples of putative pyramidal cells displaying the three distinct types of observed responses to spontaneous fIPSPs in KA-treated mice (time locked excitation **(d)**, time-locked inhibition **(e)**, or no clear change in net firing rate **(f, non responding)**). **Upper left**, average waveform from the 8 channels of the recording electrode. **Upper right**, spike autocorrelogram. **Middle**, raster display of spike firing aligned on fIPSP occurrence (**vertical blue line**, fIPSP peak). **Lower plot**, normalized peri-event time histogram (time bin, 1ms) of the neuron discharge (AP count) relative to fIPSP peak (reference, **vertical blue line**). **Inset (d)**, similar peri-event time histogram but ignoring action potential bursts (ie all spikes with preceding inter spike interval < 10ms omitted from the histogram).
